# Supplementary material
Source: PubMed Central journal article supplement (PMC10203973)
Supplement: jamainternmed-e231487-s003.pdf [file jamainternmed-e231487-s003.pdf]

\*First name, last name, and suffix (if applicable) are required and will appear in PubMed.

| <b>*Group Name(s): GRADE Study Research Group</b> |                      |                              |                         |                                     |                                                 |                                                                |                                                                                                   |
|---------------------------------------------------|----------------------|------------------------------|-------------------------|-------------------------------------|-------------------------------------------------|----------------------------------------------------------------|---------------------------------------------------------------------------------------------------|
| <b>*First Name and Middle Initial(s)</b>          | <b>*Last Name</b>    | <b>*Suffix (eg, Jr, III)</b> | <b>Academic Degrees</b> | <b>Institution</b>                  | <b>Location (city, state/province, country)</b> | <b>Role or Contribution, eg, chair, principal investigator</b> | <b>Group (if more than 1 Group listed in the byline) and/or Subgroup (eg, Steering Committee)</b> |
| Jill P.                                           | Crandall             |                              |                         | Albert Einstein College of Medicine |                                                 | PI                                                             |                                                                                                   |
| Melissa Diane                                     | McKee                |                              |                         | Albert Einstein College of Medicine |                                                 | Co-PI, past                                                    |                                                                                                   |
| Stephanie                                         | Beringher-Massera    |                              |                         | Albert Einstein College of Medicine |                                                 | Co-I, past                                                     |                                                                                                   |
| Janet                                             | Brown-Friday         |                              |                         | Albert Einstein College of Medicine |                                                 | SC                                                             |                                                                                                   |
| Entila                                            | Xhori                |                              |                         | Albert Einstein College of Medicine |                                                 | RC, past                                                       |                                                                                                   |
| Keisha                                            | Ballentine-Cargill   |                              |                         | Albert Einstein College of Medicine |                                                 | RS                                                             |                                                                                                   |
| Sally                                             | Duran                |                              |                         | Albert Einstein College of Medicine |                                                 | RS                                                             |                                                                                                   |
| Hayley                                            | Estrella             |                              |                         | Albert Einstein College of Medicine |                                                 | RS                                                             |                                                                                                   |
| Susana                                            | Gonzalez de la torre |                              |                         | Albert Einstein College of Medicine |                                                 | RS, past                                                       |                                                                                                   |
| Jennifer                                          | Lukin                |                              |                         | Albert Einstein College of Medicine |                                                 | RS, past                                                       |                                                                                                   |
| Lawrence                                          | Phillips             |                              |                         | Atlanta VA Medical Center           |                                                 | PI                                                             |                                                                                                   |
| Elizabeth                                         | Burgess              |                              |                         | Atlanta VA Medical Center           |                                                 | Co-I                                                           |                                                                                                   |
| Darin                                             | Olson                |                              |                         | Atlanta VA Medical Center           |                                                 | Co-I                                                           |                                                                                                   |
| Mary                                              | Rhee                 |                              |                         | Atlanta VA Medical Center           |                                                 | Co-I                                                           |                                                                                                   |
| Peter                                             | Wilson               |                              |                         | Atlanta VA Medical Center           |                                                 | Co-I                                                           |                                                                                                   |
| Tasha Stephanie                                   | Raines               |                              |                         | Atlanta VA Medical Center           |                                                 | SC                                                             |                                                                                                   |
| Johanna                                           | Boers                |                              |                         | Atlanta VA Medical Center           |                                                 | SC                                                             |                                                                                                   |
| Julie                                             | Costello             |                              |                         | Atlanta VA Medical Center           |                                                 | SC                                                             |                                                                                                   |

## Supplemental Online Content: Nonauthor Collaborators

\*First name, last name, and suffix (if applicable) are required and will appear in PubMed.

| *First Name and Middle Initial(s) | *Last Name       | *Suffix (eg, Jr, III) | Academic Degrees | Institution                                                                  | Location (city, state/province, country) | Role or Contribution, eg, chair, principal investigator | Group (if more than 1 Group listed in the byline) and/or Subgroup (eg, Steering Committee) |
|-----------------------------------|------------------|-----------------------|------------------|------------------------------------------------------------------------------|------------------------------------------|---------------------------------------------------------|--------------------------------------------------------------------------------------------|
| Maxine                            | Maher-Albertelli |                       |                  | Atlanta VA Medical Center                                                    |                                          | SC                                                      |                                                                                            |
| Radhika                           | Mungara          |                       |                  | Atlanta VA Medical Center                                                    |                                          | SC                                                      |                                                                                            |
| Louise                            | Savoye           |                       |                  | Atlanta VA Medical Center                                                    |                                          | SC, past                                                |                                                                                            |
| CarolAnn                          | White            |                       |                  | Atlanta VA Medical Center                                                    |                                          | SC                                                      |                                                                                            |
| Chona                             | Gullett          |                       |                  | Atlanta VA Medical Center                                                    |                                          | SC, past                                                |                                                                                            |
| Leah                              | Holloway         |                       |                  | Atlanta VA Medical Center                                                    |                                          | SC, past                                                |                                                                                            |
| Folayan                           | Morehead         |                       |                  | Atlanta VA Medical Center                                                    |                                          | SC, past                                                |                                                                                            |
| Saranjit                          | Person           |                       |                  | Atlanta VA Medical Center                                                    |                                          | SC, past                                                |                                                                                            |
| Mabil                             | Sibymon          |                       |                  | Atlanta VA Medical Center                                                    |                                          | SC, past                                                |                                                                                            |
| Sridhar                           | Tanukonda        |                       |                  | Atlanta VA Medical Center                                                    |                                          | SC, past                                                |                                                                                            |
| Cynthia                           | Adams            |                       |                  | Atlanta VA Medical Center                                                    |                                          | RC, past                                                |                                                                                            |
| April                             | Ross             |                       |                  | Atlanta VA Medical Center                                                    |                                          | RC, past                                                |                                                                                            |
| Ashok                             | Balasubramanyam  |                       |                  | Baylor College of Medicine                                                   |                                          | PI                                                      |                                                                                            |
| Ruchi                             | Gaba             |                       |                  | Baylor College of Medicine                                                   |                                          | Co-I                                                    |                                                                                            |
| Erica                             | Gonzalez         |                       |                  | Baylor College of Medicine                                                   |                                          | SC                                                      |                                                                                            |
| Adrienne                          | Ideozu           |                       |                  | Baylor College of Medicine                                                   |                                          | SC                                                      |                                                                                            |
| Julizza                           | Jimenez          |                       |                  | Baylor College of Medicine                                                   |                                          | SC                                                      |                                                                                            |
| Gabriela                          | Montes           |                       |                  | Baylor College of Medicine                                                   |                                          | RC                                                      |                                                                                            |
| Charlyne                          | Wright           |                       |                  | Baylor College of Medicine                                                   |                                          | RS, past                                                |                                                                                            |
| Priscilla                         | Hollander        |                       |                  | Baylor Research Institute                                                    |                                          | PI                                                      |                                                                                            |
| Erin                              | Roe              |                       |                  | Baylor Research Institute                                                    |                                          | Co-I, past                                              |                                                                                            |
| Analyn                            | Jackson          |                       |                  | Baylor Research Institute                                                    |                                          | SC                                                      |                                                                                            |
| Ashley                            | Smiley           |                       |                  | Baylor Research Institute                                                    |                                          | SC                                                      |                                                                                            |
| Polly                             | Burt             |                       |                  | Baylor Research Institute                                                    |                                          | SC, past                                                |                                                                                            |
| Lorie                             | Estrada          |                       |                  | Baylor Research Institute                                                    |                                          | RS                                                      |                                                                                            |
| Kris                              | Chionh           |                       |                  | Baylor Research Institute                                                    |                                          | RS, past                                                |                                                                                            |
| Famararz                          | Ismail-Beigi     |                       |                  | Case Western Reserve University/<br>Cleveland VA/ MetroHealth Medical Center |                                          | PI                                                      |                                                                                            |

## Supplemental Online Content: Nonauthor Collaborators

\*First name, last name, and suffix (if applicable) are required and will appear in PubMed.

| *First Name and Middle Initial(s) | *Last Name    | *Suffix (eg, Jr, III) | Academic Degrees | Institution                                                                  | Location (city, state/province, country) | Role or Contribution, eg, chair, principal investigator | Group (if more than 1 Group listed in the byline) and/or Subgroup (eg, Steering Committee) |
|-----------------------------------|---------------|-----------------------|------------------|------------------------------------------------------------------------------|------------------------------------------|---------------------------------------------------------|--------------------------------------------------------------------------------------------|
| Corinna                           | Falck-Ytter   |                       |                  | Case Western Reserve University/<br>Cleveland VA/ MetroHealth Medical Center |                                          | Co-PI                                                   |                                                                                            |
| Laure                             | Sayyed Kassem |                       |                  | Case Western Reserve University/<br>Cleveland VA/ MetroHealth Medical Center |                                          | Co-PI                                                   |                                                                                            |
| Ajay                              | Sood          |                       |                  | Case Western Reserve University/<br>Cleveland VA/ MetroHealth Medical Center |                                          | Co-PI, past                                             |                                                                                            |
| Margaret                          | Tiktin        |                       |                  | Case Western Reserve University/<br>Cleveland VA/ MetroHealth Medical Center |                                          | Co-I, SC                                                | Executive Committee                                                                        |
| Bethany                           | Cramer        |                       |                  | Case Western Reserve University/<br>Cleveland VA/ MetroHealth Medical Center |                                          | SC, past                                                |                                                                                            |
| Jacalyn                           | Iacoboni      |                       |                  | Case Western Reserve University/<br>Cleveland VA/ MetroHealth Medical Center |                                          | SC, past                                                |                                                                                            |
| Maria V.                          | Kononets      |                       |                  | Case Western Reserve University/<br>Cleveland VA/ MetroHealth Medical Center |                                          | SC, past                                                |                                                                                            |
| Tanya                             | Kulow         |                       |                  | Case Western Reserve University/<br>Cleveland VA/ MetroHealth Medical Center |                                          | SC                                                      |                                                                                            |
| Cynthia                           | Newman        |                       |                  | Case Western Reserve University/<br>Cleveland VA/ MetroHealth Medical Center |                                          | SC                                                      |                                                                                            |
| Katherine A.                      | Stancil       |                       |                  | Case Western Reserve University/<br>Cleveland VA/ MetroHealth Medical Center |                                          | SC                                                      |                                                                                            |

Supplemental Online Content: Nonauthor Collaborators

\*First name, last name, and suffix (if applicable) are required and will appear in PubMed.

| *First Name and Middle Initial(s) | *Last Name | *Suffix (eg, Jr, III) | Academic Degrees | Institution                                                                  | Location (city, state/province, country) | Role or Contribution, eg, chair, principal investigator | Group (if more than 1 Group listed in the byline) and/or Subgroup (eg, Steering Committee) |
|-----------------------------------|------------|-----------------------|------------------|------------------------------------------------------------------------------|------------------------------------------|---------------------------------------------------------|--------------------------------------------------------------------------------------------|
| Cristina                          | Sanders    |                       |                  | Case Western Reserve University/<br>Cleveland VA/ MetroHealth Medical Center |                                          | SC, past                                                |                                                                                            |
| Lisa                              | Tucker     |                       |                  | Case Western Reserve University/<br>Cleveland VA/ MetroHealth Medical Center |                                          | SC, past                                                |                                                                                            |
| Amanda                            | Werner     |                       |                  | Case Western Reserve University/<br>Cleveland VA/ MetroHealth Medical Center |                                          | SC, past                                                |                                                                                            |
| Adrienne                          | Krol       |                       |                  | Case Western Reserve University/<br>Cleveland VA/ MetroHealth Medical Center |                                          | RS, past                                                |                                                                                            |
| Gloria                            | McPhee     |                       |                  | Case Western Reserve University/<br>Cleveland VA/ MetroHealth Medical Center |                                          | RS                                                      |                                                                                            |
| Christine                         | Patel      |                       |                  | Case Western Reserve University/<br>Cleveland VA/ MetroHealth Medical Center |                                          | RS                                                      |                                                                                            |
| Linda                             | Colosimo   |                       |                  | Case Western Reserve University/<br>Cleveland VA/ MetroHealth Medical Center |                                          | RS, past                                                |                                                                                            |
| Audrey                            | Maxwell    |                       |                  | Case Western Reserve University/<br>Cleveland VA/ MetroHealth Medical Center |                                          | RS                                                      |                                                                                            |
| Robin                             | Goland     |                       |                  | Columbia University Medical Center                                           |                                          | PI                                                      |                                                                                            |
| James                             | Pring      |                       |                  | Columbia University Medical Center                                           |                                          | SC                                                      |                                                                                            |
| Lucia                             | Alfano     |                       |                  | Columbia University Medical Center                                           |                                          | SC                                                      |                                                                                            |

## Supplemental Online Content: Nonauthor Collaborators

\*First name, last name, and suffix (if applicable) are required and will appear in PubMed.

| *First Name and Middle Initial(s) | *Last Name    | *Suffix (eg, Jr, III) | Academic Degrees | Institution                        | Location (city, state/province, country) | Role or Contribution, eg, chair, principal investigator | Group (if more than 1 Group listed in the byline) and/or Subgroup (eg, Steering Committee) |
|-----------------------------------|---------------|-----------------------|------------------|------------------------------------|------------------------------------------|---------------------------------------------------------|--------------------------------------------------------------------------------------------|
| Patricia                          | Kringas       |                       |                  | Columbia University Medical Center |                                          | SC, past                                                |                                                                                            |
| Camille                           | Hausheer      |                       |                  | Columbia University Medical Center |                                          | RC, past                                                |                                                                                            |
| Jessica                           | Tejada        |                       |                  | Columbia University Medical Center |                                          | RC, past                                                |                                                                                            |
| Kelly                             | Gumpel        |                       |                  | Columbia University Medical Center |                                          | RS, past                                                |                                                                                            |
| Amanda                            | Kirpitch      |                       |                  | Columbia University Medical Center |                                          | RS, past                                                |                                                                                            |
| Harvey                            | Schneier      |                       |                  | Columbia University Medical Center |                                          | RS, past                                                |                                                                                            |
| Jennifer B.                       | Green         |                       |                  | Duke University Medical Center     |                                          | PI                                                      |                                                                                            |
| Hiba                              | AbouAssi      |                       |                  | Duke University Medical Center     |                                          | Co-I                                                    |                                                                                            |
| Ranee                             | Chatterjee    |                       |                  | Duke University Medical Center     |                                          | Co-I                                                    |                                                                                            |
| Mark N.                           | Feinglos      |                       |                  | Duke University Medical Center     |                                          | Co-I, past                                              |                                                                                            |
| Jennifer                          | English Jones |                       |                  | Duke University Medical Center     |                                          | SC, RC                                                  |                                                                                            |
| Shubi A.                          | Khan          |                       |                  | Duke University Medical Center     |                                          | SC, RC                                                  |                                                                                            |
| Jeanne B.                         | Kimpel        |                       |                  | Duke University Medical Center     |                                          | SC, past                                                |                                                                                            |
| Ronna P.                          | Zimmer        |                       |                  | Duke University Medical Center     |                                          | SC, past                                                |                                                                                            |
| Mary                              | Furst         |                       |                  | Duke University Medical Center     |                                          | RC, past                                                |                                                                                            |
| Barbara M.                        | Satterwhite   |                       |                  | Duke University Medical Center     |                                          | RS                                                      |                                                                                            |
| Connie R                          | Thacker       |                       |                  | Duke University Medical Center     |                                          | RS                                                      |                                                                                            |
| Kathryn                           | Evans Kreider |                       |                  | Duke University Medical Center     |                                          | RS, past                                                |                                                                                            |
| Cary N                            | Mariash       |                       |                  | Indiana University                 |                                          | PI                                                      |                                                                                            |
| Kieren J.                         | Mather        |                       |                  | Indiana University                 |                                          | PI, past                                                |                                                                                            |
| Heba M                            | Ismail        |                       |                  | Indiana University                 |                                          | Co-I                                                    |                                                                                            |
| Amale                             | Lteif         |                       |                  | Indiana University                 |                                          | Co-I, past                                              |                                                                                            |
| Maureen                           | Mullen        |                       |                  | Indiana University                 |                                          | SC                                                      |                                                                                            |
| Tonya                             | Hamilton      |                       |                  | Indiana University                 |                                          | SC, past                                                |                                                                                            |
| Nick                              | Patel         |                       |                  | Indiana University                 |                                          | SC                                                      |                                                                                            |

## Supplemental Online Content: Nonauthor Collaborators

\*First name, last name, and suffix (if applicable) are required and will appear in PubMed.

| *First Name and Middle Initial(s) | *Last Name       | *Suffix (eg, Jr, III) | Academic Degrees | Institution                   | Location (city, state/province, country) | Role or Contribution, eg, chair, principal investigator | Group (if more than 1 Group listed in the byline) and/or Subgroup (eg, Steering Committee) |
|-----------------------------------|------------------|-----------------------|------------------|-------------------------------|------------------------------------------|---------------------------------------------------------|--------------------------------------------------------------------------------------------|
| Gabriela                          | Riera            |                       |                  | Indiana University            |                                          | RC                                                      |                                                                                            |
| Marcia                            | Jackson          |                       |                  | Indiana University            |                                          | RC, past                                                |                                                                                            |
| Vivian                            | Pirics           |                       |                  | Indiana University            |                                          | RC, past                                                |                                                                                            |
| Devin                             | Howard           |                       |                  | Indiana University            |                                          | RS, past                                                |                                                                                            |
| Danielle                          | Aguillar         |                       |                  | Indiana University            |                                          | RS, past                                                |                                                                                            |
| Sloan                             | Hurt             |                       |                  | Indiana University            |                                          | RS, past                                                |                                                                                            |
| Richard                           | Bergenstal       |                       |                  | International Diabetes Center |                                          | PI                                                      |                                                                                            |
| Anders                            | Carlson          |                       |                  | International Diabetes Center |                                          | Co-I                                                    |                                                                                            |
| Thomas                            | Martens          |                       |                  | International Diabetes Center |                                          | Co-I                                                    |                                                                                            |
| Mary                              | Johnson          |                       |                  | International Diabetes Center |                                          | SC                                                      |                                                                                            |
| Renae                             | Hill             |                       |                  | International Diabetes Center |                                          | SC                                                      |                                                                                            |
| Jamie                             | Hyatt            |                       |                  | International Diabetes Center |                                          | SC                                                      |                                                                                            |
| Connie                            | Jensen           |                       |                  | International Diabetes Center |                                          | SC                                                      |                                                                                            |
| Marcia                            | Madden           |                       |                  | International Diabetes Center |                                          | SC                                                      |                                                                                            |
| Dianna                            | Martin           |                       |                  | International Diabetes Center |                                          | SC                                                      |                                                                                            |
| Holly                             | Willis           |                       |                  | International Diabetes Center |                                          | SC                                                      |                                                                                            |
| Wanda                             | Konerza          |                       |                  | International Diabetes Center |                                          | RS                                                      |                                                                                            |
| Shoua                             | Yang             |                       |                  | International Diabetes Center |                                          | RS                                                      |                                                                                            |
| Rebecca                           | Passi            |                       |                  | International Diabetes Center |                                          | RS, past                                                |                                                                                            |
| Kathleen                          | Kleeberger       |                       |                  | International Diabetes Center |                                          | RS, past                                                |                                                                                            |
| Stephen                           | Fortmann         |                       |                  | Kaiser Permanente Northwest   |                                          | PI                                                      |                                                                                            |
| Michael                           | Herson           |                       |                  | Kaiser Permanente Northwest   |                                          | Co-I                                                    |                                                                                            |
| Karen                             | Mularski         |                       |                  | Kaiser Permanente Northwest   |                                          | Co-I                                                    |                                                                                            |
| Harry                             | Glauber          |                       |                  | Kaiser Permanente Northwest   |                                          | Co-I, past                                              |                                                                                            |
| James                             | Prihoda          |                       |                  | Kaiser Permanente Northwest   |                                          | Co-I, past                                              |                                                                                            |
| Britt                             | Ash              |                       |                  | Kaiser Permanente Northwest   |                                          | SC                                                      |                                                                                            |
| Christina                         | Carlson          |                       |                  | Kaiser Permanente Northwest   |                                          | SC                                                      |                                                                                            |
| Phyllis Anne                      | Ramey            |                       |                  | Kaiser Permanente Northwest   |                                          | SC                                                      |                                                                                            |
| Emily                             | Schild           |                       |                  | Kaiser Permanente Northwest   |                                          | SC                                                      |                                                                                            |
| Britta                            | Torgimson-Ojerio |                       |                  | Kaiser Permanente Northwest   |                                          | SC                                                      |                                                                                            |

## Supplemental Online Content: Nonauthor Collaborators

\*First name, last name, and suffix (if applicable) are required and will appear in PubMed.

| *First Name and Middle Initial(s) | *Last Name    | *Suffix (eg, Jr, III) | Academic Degrees | Institution                    | Location (city, state/province, country) | Role or Contribution, eg, chair, principal investigator | Group (if more than 1 Group listed in the byline) and/or Subgroup (eg, Steering Committee) |
|-----------------------------------|---------------|-----------------------|------------------|--------------------------------|------------------------------------------|---------------------------------------------------------|--------------------------------------------------------------------------------------------|
| Kathy                             | Arnold        |                       |                  | Kaiser Permanente Northwest    |                                          | SC, past                                                |                                                                                            |
| Bryan                             | Kauffman      |                       |                  | Kaiser Permanente Northwest    |                                          | SC, past                                                |                                                                                            |
| Elease                            | Panos         |                       |                  | Kaiser Permanente Northwest    |                                          | SC, past                                                |                                                                                            |
| Samantha                          | Sahnow        |                       |                  | Kaiser Permanente Northwest    |                                          | RC                                                      |                                                                                            |
| Kristi                            | Bays          |                       |                  | Kaiser Permanente Northwest    |                                          | RS                                                      |                                                                                            |
| Jennifer                          | Cook          |                       |                  | Kaiser Permanente Northwest    |                                          | RS                                                      |                                                                                            |
| Jennifer                          | Gluth         |                       |                  | Kaiser Permanente Northwest    |                                          | RS                                                      |                                                                                            |
| Debra                             | Ghioni        |                       |                  | Kaiser Permanente Northwest    |                                          | RS                                                      |                                                                                            |
| Katrina                           | Schell        |                       |                  | Kaiser Permanente Northwest    |                                          | RS                                                      |                                                                                            |
| Jennifer                          | Criscola      |                       |                  | Kaiser Permanente Northwest    |                                          | RS, past                                                |                                                                                            |
| Camille                           | Friason       |                       |                  | Kaiser Permanente Northwest    |                                          | RS, past                                                |                                                                                            |
| Suzi                              | Jones         |                       |                  | Kaiser Permanente Northwest    |                                          | RS, past                                                |                                                                                            |
| Sergey                            | Nazarov       |                       |                  | Kaiser Permanente Northwest    |                                          | RS, past                                                |                                                                                            |
| Joshua                            | Barzilay      |                       |                  | Kaiser Permanente of Georgia   |                                          | PI                                                      |                                                                                            |
| Negah                             | Rassouli      |                       |                  | Kaiser Permanente of Georgia   |                                          | Co-PI                                                   |                                                                                            |
| Rachel                            | Puttnam       |                       |                  | Kaiser Permanente of Georgia   |                                          | Co-I                                                    |                                                                                            |
| Olubukola                         | Ojoawo        |                       |                  | Kaiser Permanente of Georgia   |                                          | SC                                                      |                                                                                            |
| Roslin                            | Nelson        |                       |                  | Kaiser Permanente of Georgia   |                                          | RC                                                      |                                                                                            |
| Michelle                          | Curtis        |                       |                  | Kaiser Permanente of Georgia   |                                          | SC, past                                                |                                                                                            |
| Bonita                            | Hollis        |                       |                  | Kaiser Permanente of Georgia   |                                          | SC, past                                                |                                                                                            |
| Cynthia                           | Sanders-Jones |                       |                  | Kaiser Permanente of Georgia   |                                          | SC, past                                                |                                                                                            |
| Kia                               | Stokes        |                       |                  | Kaiser Permanente of Georgia   |                                          | SC, past                                                |                                                                                            |
| Zakiah                            | El-Haqq       |                       |                  | Kaiser Permanente of Georgia   |                                          | SC, past                                                |                                                                                            |
| Abby                              | Kolli         |                       |                  | Kaiser Permanente of Georgia   |                                          | RS, past                                                |                                                                                            |
| Tu                                | Tran          |                       |                  | Kaiser Permanente of Georgia   |                                          | RS, past                                                |                                                                                            |
| Deborah                           | Wexler        |                       |                  | Massachusetts General Hospital |                                          | PI                                                      | Executive Committee                                                                        |
| Mary                              | Larkin        |                       |                  | Massachusetts General Hospital |                                          | Co-I, SC                                                | Executive Committee                                                                        |
| James                             | Meigs         |                       |                  | Massachusetts General Hospital |                                          | Co-I                                                    |                                                                                            |
| Brittany                          | Chambers      |                       |                  | Massachusetts General Hospital |                                          | SC, past                                                |                                                                                            |
| Amy                               | Dushkin       |                       |                  | Massachusetts General Hospital |                                          | SC, past                                                |                                                                                            |

## Supplemental Online Content: Nonauthor Collaborators

\*First name, last name, and suffix (if applicable) are required and will appear in PubMed.

| *First Name and Middle Initial(s) | *Last Name  | *Suffix (eg, Jr, III) | Academic Degrees | Institution                                             | Location (city, state/province, country) | Role or Contribution, eg, chair, principal investigator | Group (if more than 1 Group listed in the byline) and/or Subgroup (eg, Steering Committee) |
|-----------------------------------|-------------|-----------------------|------------------|---------------------------------------------------------|------------------------------------------|---------------------------------------------------------|--------------------------------------------------------------------------------------------|
| Gianna                            | Rocchio     |                       |                  | Massachusetts General Hospital                          |                                          | SC, past                                                |                                                                                            |
| Mike                              | Yepes       |                       |                  | Massachusetts General Hospital                          |                                          | SC, past                                                |                                                                                            |
| Barbara                           | Steiner     |                       |                  | Massachusetts General Hospital                          |                                          | RC                                                      |                                                                                            |
| Hilary                            | Dulin       |                       |                  | Massachusetts General Hospital                          |                                          | RC, past                                                |                                                                                            |
| Melody                            | Cayford     |                       |                  | Massachusetts General Hospital                          |                                          | RS                                                      |                                                                                            |
| Andrea                            | DeManbey    |                       |                  | Massachusetts General Hospital                          |                                          | RS                                                      |                                                                                            |
| Mallory                           | Hillard     |                       |                  | Massachusetts General Hospital                          |                                          | RS                                                      |                                                                                            |
| Kimberly                          | Martin      |                       |                  | Massachusetts General Hospital                          |                                          | RS                                                      |                                                                                            |
| Nopporn                           | Thangthaeng |                       |                  | Massachusetts General Hospital                          |                                          | RS                                                      |                                                                                            |
| Lindsey                           | Gurry       |                       |                  | Massachusetts General Hospital                          |                                          | RS, past                                                |                                                                                            |
| Raquel                            | Kochis      |                       |                  | Massachusetts General Hospital                          |                                          | RS, past                                                |                                                                                            |
| Elyse                             | Raymond     |                       |                  | Massachusetts General Hospital                          |                                          | RS, past                                                |                                                                                            |
| Valerie                           | Ripley      |                       |                  | Massachusetts General Hospital                          |                                          | RS, past                                                |                                                                                            |
| Christine                         | Stevens     |                       |                  | Massachusetts General Hospital                          |                                          | RS, past                                                |                                                                                            |
| Jean                              | Park        |                       |                  | MedStar Health Research Institute/<br>MedStar Baltimore |                                          | PI                                                      |                                                                                            |
| Vanita                            | Aroda       |                       |                  | MedStar Health Research Institute/<br>MedStar Baltimore |                                          | PI, past                                                |                                                                                            |
| Adline                            | Ghazi       |                       |                  | MedStar Health Research Institute/<br>MedStar Baltimore |                                          | Co-PI                                                   |                                                                                            |
| Michelle                          | Magee       |                       |                  | MedStar Health Research Institute/<br>MedStar Baltimore |                                          | Co-I                                                    |                                                                                            |
| Ann                               | Ressing     |                       |                  | MedStar Health Research Institute/<br>MedStar Baltimore |                                          | Co-I                                                    |                                                                                            |
| Amy                               | Loveland    |                       |                  | MedStar Health Research Institute/<br>MedStar Baltimore |                                          | SC                                                      |                                                                                            |
| Mia                               | Hamm        |                       |                  | MedStar Health Research Institute/<br>MedStar Baltimore |                                          | SC                                                      |                                                                                            |
| Maria                             | Hurtado     |                       |                  | MedStar Health Research Institute/<br>MedStar Baltimore |                                          | SC                                                      |                                                                                            |

## Supplemental Online Content: Nonauthor Collaborators

\*First name, last name, and suffix (if applicable) are required and will appear in PubMed.

| *First Name and Middle Initial(s) | *Last Name       | *Suffix (eg, Jr, III) | Academic Degrees | Institution                                             | Location (city, state/province, country) | Role or Contribution, eg, chair, principal investigator | Group (if more than 1 Group listed in the byline) and/or Subgroup (eg, Steering Committee) |
|-----------------------------------|------------------|-----------------------|------------------|---------------------------------------------------------|------------------------------------------|---------------------------------------------------------|--------------------------------------------------------------------------------------------|
| Alexander                         | Kuhn             |                       |                  | MedStar Health Research Institute/<br>MedStar Baltimore |                                          | SC                                                      |                                                                                            |
| Jayne L.                          | Leger            |                       |                  | MedStar Health Research Institute/<br>MedStar Baltimore |                                          | SC                                                      |                                                                                            |
| Lumanti                           | Manandhar        |                       |                  | MedStar Health Research Institute/<br>MedStar Baltimore |                                          | SC                                                      |                                                                                            |
| Florence                          | Mwici            |                       |                  | MedStar Health Research Institute/<br>MedStar Baltimore |                                          | SC                                                      |                                                                                            |
| Osirelis                          | Sanchez          |                       |                  | MedStar Health Research Institute/<br>MedStar Baltimore |                                          | SC                                                      |                                                                                            |
| Theresa                           | Young            |                       |                  | MedStar Health Research Institute/<br>MedStar Baltimore |                                          | SC                                                      |                                                                                            |
| Rajesh                            | Garg             |                       |                  | Miami VA Healthcare<br>System/University of Miami       |                                          | PI                                                      |                                                                                            |
| Victoria                          | Lagari-Libhaber  |                       |                  | Miami VA Healthcare<br>System/University of Miami       |                                          | PI                                                      |                                                                                            |
| Hermes J                          | Florez           |                       |                  | Miami VA Healthcare<br>System/University of Miami       |                                          | PI, past                                                |                                                                                            |
| Willy M                           | Valencia         |                       |                  | Miami VA Healthcare<br>System/University of Miami       |                                          | PI, past                                                |                                                                                            |
| Jennifer                          | Mark             |                       |                  | Miami VA Healthcare<br>System/University of Miami       |                                          | Co-I, past                                              |                                                                                            |
| Sabina                            | Casula           |                       |                  | Miami VA Healthcare<br>System/University of Miami       |                                          | Co-I                                                    |                                                                                            |
| Lisset                            | Oropesa-Gonzalez |                       |                  | Miami VA Healthcare<br>System/University of Miami       |                                          | SC                                                      |                                                                                            |
| Lisa                              | Hue              |                       |                  | Miami VA Healthcare<br>System/University of Miami       |                                          | SC, past                                                |                                                                                            |
| Alain                             | Cuadot           |                       |                  | Miami VA Healthcare<br>System/University of Miami       |                                          | SC, past                                                |                                                                                            |

## Supplemental Online Content: Nonauthor Collaborators

\*First name, last name, and suffix (if applicable) are required and will appear in PubMed.

| <b>*First Name and Middle Initial(s)</b> | <b>*Last Name</b> | <b>*Suffix (eg, Jr, III)</b> | Academic Degrees | Institution                                    | Location (city, state/province, country) | Role or Contribution, eg, chair, principal investigator | Group (if more than 1 Group listed in the byline) and/or Subgroup (eg, Steering Committee) |
|------------------------------------------|-------------------|------------------------------|------------------|------------------------------------------------|------------------------------------------|---------------------------------------------------------|--------------------------------------------------------------------------------------------|
| Ramfis                                   | Nieto-Martinez    |                              |                  | Miami VA Healthcare System/University of Miami |                                          | SC                                                      |                                                                                            |
| Ana K                                    | Riccio Veliz      |                              |                  | Miami VA Healthcare System/University of Miami |                                          | SC, past                                                |                                                                                            |
| Miriam                                   | Gutt              |                              |                  | Miami VA Healthcare System/University of Miami |                                          | RC, past                                                |                                                                                            |
| Yvette J                                 | Kendal            |                              |                  | Miami VA Healthcare System/University of Miami |                                          | RS, past                                                |                                                                                            |
| Bertha                                   | Veciana           |                              |                  | Miami VA Healthcare System/University of Miami |                                          | RS, past                                                |                                                                                            |
| Andrew                                   | Ahmann            |                              |                  | Oregon Health & Science University             |                                          | PI                                                      |                                                                                            |
| Diana                                    | Aby-Daniel        |                              |                  | Oregon Health & Science University             |                                          | Co-I                                                    |                                                                                            |
| Farahnaz                                 | Joarder           |                              |                  | Oregon Health & Science University             |                                          | Co-I                                                    |                                                                                            |
| Victoria                                 | Morimoto          |                              |                  | Oregon Health & Science University             |                                          | Co-I                                                    |                                                                                            |
| Carol                                    | Sprague           |                              |                  | Oregon Health & Science University             |                                          | Co-I                                                    |                                                                                            |
| Daisuke                                  | Yamashita         |                              |                  | Oregon Health & Science University             |                                          | Co-I                                                    |                                                                                            |
| Nancy                                    | Cady              |                              |                  | Oregon Health & Science University             |                                          | SC                                                      |                                                                                            |
| Nadia                                    | Rivera-Eschright  |                              |                  | Oregon Health & Science University             |                                          | SC                                                      |                                                                                            |
| Patricia                                 | Kirchhoff         |                              |                  | Oregon Health & Science University             |                                          | SC, past                                                |                                                                                            |
| Brianna                                  | Morales Gonzalez  |                              |                  | Oregon Health & Science University             |                                          | RC                                                      |                                                                                            |

## Supplemental Online Content: Nonauthor Collaborators

\*First name, last name, and suffix (if applicable) are required and will appear in PubMed.

| <b>*First Name and Middle Initial(s)</b> | <b>*Last Name</b> | <b>*Suffix (eg, Jr, III)</b> | Academic Degrees | Institution                                                        | Location (city, state/province, country) | Role or Contribution, eg, chair, principal investigator | Group (if more than 1 Group listed in the byline) and/or Subgroup (eg, Steering Committee) |
|------------------------------------------|-------------------|------------------------------|------------------|--------------------------------------------------------------------|------------------------------------------|---------------------------------------------------------|--------------------------------------------------------------------------------------------|
| Joseph                                   | Adducci           |                              |                  | Oregon Health & Science University                                 |                                          | RC, past                                                |                                                                                            |
| Alina                                    | Goncharova        |                              |                  | Oregon Health & Science University                                 |                                          | RC, past                                                |                                                                                            |
| Sophia H                                 | Hox               |                              |                  | Pacific Health Research and Education Institute/VA Pacific Islands |                                          | PI                                                      |                                                                                            |
| Helen                                    | Petrovich         |                              |                  | Pacific Health Research and Education Institute/VA Pacific Islands |                                          | Co-PI                                                   |                                                                                            |
| Michael                                  | Matwichyna        |                              |                  | Pacific Health Research and Education Institute/VA Pacific Islands |                                          | SC                                                      |                                                                                            |
| Victoria                                 | Jenkins           |                              |                  | Pacific Health Research and Education Institute/VA Pacific Islands |                                          | SC, past                                                |                                                                                            |
| L                                        | Broadwater        |                              |                  | Pacific Health Research and Education Institute/VA Pacific Islands |                                          | RS                                                      |                                                                                            |
| Renée R.                                 | Ishii             |                              |                  | Pacific Health Research and Education Institute/VA Pacific Islands |                                          | RS                                                      |                                                                                            |
| Nina O.                                  | Bermudez          |                              |                  | Pacific Health Research and Education Institute/VA Pacific Islands |                                          | RS, past                                                |                                                                                            |
| Daniel S.                                | Hsia              |                              |                  | Pennington Biomedical Research Center                              |                                          | PI                                                      |                                                                                            |
| William T.                               | Cefalu            |                              |                  | Pennington Biomedical Research Center                              |                                          | PI, past                                                |                                                                                            |
| Frank L.                                 | Greenway          |                              |                  | Pennington Biomedical Research Center                              |                                          | Co-I                                                    |                                                                                            |

## Supplemental Online Content: Nonauthor Collaborators

\*First name, last name, and suffix (if applicable) are required and will appear in PubMed.

| *First Name and Middle Initial(s) | *Last Name    | *Suffix (eg, Jr, III) | Academic Degrees | Institution                           | Location (city, state/province, country) | Role or Contribution, eg, chair, principal investigator | Group (if more than 1 Group listed in the byline) and/or Subgroup (eg, Steering Committee) |
|-----------------------------------|---------------|-----------------------|------------------|---------------------------------------|------------------------------------------|---------------------------------------------------------|--------------------------------------------------------------------------------------------|
| Celeste                           | Waguespack    |                       |                  | Pennington Biomedical Research Center |                                          | Co-I                                                    |                                                                                            |
| Erin                              | King          |                       |                  | Pennington Biomedical Research Center |                                          | SC                                                      |                                                                                            |
| Greta                             | Fry           |                       |                  | Pennington Biomedical Research Center |                                          | SC                                                      |                                                                                            |
| Amber                             | Dragg         |                       |                  | Pennington Biomedical Research Center |                                          | SC                                                      |                                                                                            |
| Bethany                           | Gildersleeve  |                       |                  | Pennington Biomedical Research Center |                                          | SC                                                      |                                                                                            |
| Jennifer                          | Arceneaux     |                       |                  | Pennington Biomedical Research Center |                                          | SC                                                      |                                                                                            |
| Natalie                           | Haynes        |                       |                  | Pennington Biomedical Research Center |                                          | SC, past                                                |                                                                                            |
| Amy                               | Thomassie     |                       |                  | Pennington Biomedical Research Center |                                          | SC, past                                                |                                                                                            |
| Mallory                           | Pavlionis     |                       |                  | Pennington Biomedical Research Center |                                          | SC, past                                                |                                                                                            |
| Brandi                            | Bourgeois     |                       |                  | Pennington Biomedical Research Center |                                          | RC, past                                                |                                                                                            |
| Claire                            | Hazlett       |                       |                  | Pennington Biomedical Research Center |                                          | RS                                                      |                                                                                            |
| Sunder                            | Mudaliar      |                       |                  | San Diego VA Medical Center           |                                          | PI                                                      |                                                                                            |
| Henry                             | Robert        |                       |                  | San Diego VA Medical Center           |                                          | PI, past                                                |                                                                                            |
| Schafer                           | Boeder        |                       |                  | San Diego VA Medical Center           |                                          | Co-I, past                                              |                                                                                            |
| Jeremy                            | Pettus        |                       |                  | San Diego VA Medical Center           |                                          | Co-I, past                                              |                                                                                            |
| Elsa                              | Diaz          |                       |                  | San Diego VA Medical Center           |                                          | SC                                                      |                                                                                            |
| Daneila                           | Garcia-Acosta |                       |                  | San Diego VA Medical Center           |                                          | RS                                                      |                                                                                            |
| Sarah                             | Maggs         |                       |                  | San Diego VA Medical Center           |                                          | SC                                                      |                                                                                            |
| Catherine                         | DeLue         |                       |                  | San Diego VA Medical Center           |                                          | SC, past                                                |                                                                                            |
| Andrea                            | Stallings     |                       |                  | San Diego VA Medical Center           |                                          | SC, past                                                |                                                                                            |

## Supplemental Online Content: Nonauthor Collaborators

\*First name, last name, and suffix (if applicable) are required and will appear in PubMed.

| *First Name and Middle Initial(s) | *Last Name | *Suffix (eg, Jr, III) | Academic Degrees | Institution                                            | Location (city, state/province, country) | Role or Contribution, eg, chair, principal investigator | Group (if more than 1 Group listed in the byline) and/or Subgroup (eg, Steering Committee) |
|-----------------------------------|------------|-----------------------|------------------|--------------------------------------------------------|------------------------------------------|---------------------------------------------------------|--------------------------------------------------------------------------------------------|
| Erick                             | Castro     |                       |                  | San Diego VA Medical Center                            |                                          | RC, past                                                |                                                                                            |
| Sylvia                            | Hernandez  |                       |                  | San Diego VA Medical Center                            |                                          | RC, past                                                |                                                                                            |
| Jonathan                          | Krakoff    |                       |                  | Southwestern American Indian Center                    |                                          | PI                                                      |                                                                                            |
| Jeffrey M.                        | Curtis     |                       |                  | Southwestern American Indian Center                    |                                          | Co-I                                                    |                                                                                            |
| Tina                              | Killean    |                       |                  | Southwestern American Indian Center                    |                                          | SC                                                      |                                                                                            |
| Meshall                           | Khalid     |                       |                  | Southwestern American Indian Center                    |                                          | SC                                                      |                                                                                            |
| Erica                             | Joshevama  |                       |                  | Southwestern American Indian Center                    |                                          | RC, past                                                |                                                                                            |
| Enrique                           | Diaz       |                       |                  | Southwestern American Indian Center                    |                                          | RS                                                      |                                                                                            |
| Denelle                           | Martin     |                       |                  | Southwestern American Indian Center                    |                                          | RS                                                      |                                                                                            |
| Kaylee                            | Tsingine   |                       |                  | Southwestern American Indian Center                    |                                          | RS                                                      |                                                                                            |
| Tracey                            | Karshner   |                       |                  | Southwestern American Indian Center                    |                                          | RS, past                                                |                                                                                            |
| Jeanine                           | Albu       |                       |                  | St. Luke's-Roosevelt Hospital                          |                                          | Co-I                                                    |                                                                                            |
| F. Xavier                         | Pi-Sunyer  |                       |                  | St. Luke's-Roosevelt Hospital                          |                                          | Co-PI, past                                             |                                                                                            |
| Sylvaine                          | Frances    |                       |                  | St. Luke's-Roosevelt Hospital                          |                                          | Co-I                                                    |                                                                                            |
| Carol                             | Maggio     |                       |                  | St. Luke's-Roosevelt Hospital                          |                                          | SC, past                                                |                                                                                            |
| Emily                             | Ellis      |                       |                  | St. Luke's-Roosevelt Hospital                          |                                          | RC                                                      |                                                                                            |
| Joseph                            | Bastawrose |                       |                  | St. Luke's-Roosevelt Hospital                          |                                          | RC, past                                                |                                                                                            |
| Xiuqun                            | Gong       |                       |                  | St. Luke's-Roosevelt Hospital                          |                                          | RS                                                      |                                                                                            |
| Mary Ann                          | Banerji    |                       |                  | SUNY Downstate Medical Center/New York Hospital-Queens |                                          | PI                                                      |                                                                                            |

Supplemental Online Content: Nonauthor Collaborators

\*First name, last name, and suffix (if applicable) are required and will appear in PubMed.

| <b>*First Name and Middle Initial(s)</b> | <b>*Last Name</b> | <b>*Suffix (eg, Jr, III)</b> | Academic Degrees | Institution                                            | Location (city, state/province, country) | Role or Contribution, eg, chair, principal investigator | Group (if more than 1 Group listed in the byline) and/or Subgroup (eg, Steering Committee) |
|------------------------------------------|-------------------|------------------------------|------------------|--------------------------------------------------------|------------------------------------------|---------------------------------------------------------|--------------------------------------------------------------------------------------------|
| Phyllis                                  | August            |                              |                  | SUNY Downstate Medical Center/New York Hospital-Queens |                                          | Co-I                                                    |                                                                                            |
| Melissa                                  | Lee               |                              |                  | SUNY Downstate Medical Center/New York Hospital-Queens |                                          | Co-I                                                    |                                                                                            |
| Daniel                                   | Lorber            |                              |                  | SUNY Downstate Medical Center/New York Hospital-Queens |                                          | Co-I                                                    |                                                                                            |
| Brown                                    | Necole M.         |                              |                  | SUNY Downstate Medical Center/New York Hospital-Queens |                                          | SC, RC                                                  |                                                                                            |
| Debra H.                                 | Josephson         |                              |                  | SUNY Downstate Medical Center/New York Hospital-Queens |                                          | SC                                                      |                                                                                            |
| Lorraine L.                              | Thomas            |                              |                  | SUNY Downstate Medical Center/New York Hospital-Queens |                                          | SC, RC                                                  |                                                                                            |
| Maria                                    | Tsovian           |                              |                  | SUNY Downstate Medical Center/New York Hospital-Queens |                                          | SC, RC                                                  |                                                                                            |
| Ajini                                    | Cherian           |                              |                  | SUNY Downstate Medical Center/New York Hospital-Queens |                                          | SC, RC, past                                            |                                                                                            |
| Marlo H.                                 | Jacobson          |                              |                  | SUNY Downstate Medical Center/New York Hospital-Queens |                                          | RS                                                      |                                                                                            |
| Motria M.                                | Mishko            |                              |                  | SUNY Downstate Medical Center/New York Hospital-Queens |                                          | RS                                                      |                                                                                            |

## Supplemental Online Content: Nonauthor Collaborators

\*First name, last name, and suffix (if applicable) are required and will appear in PubMed.

| <b>*First Name and Middle Initial(s)</b> | <b>*Last Name</b> | <b>*Suffix (eg, Jr, III)</b> | Academic Degrees | Institution                                           | Location (city, state/province, country) | Role or Contribution, eg, chair, principal investigator | Group (if more than 1 Group listed in the byline) and/or Subgroup (eg, Steering Committee) |
|------------------------------------------|-------------------|------------------------------|------------------|-------------------------------------------------------|------------------------------------------|---------------------------------------------------------|--------------------------------------------------------------------------------------------|
| Sue M.                                   | Kirkman           |                              |                  | The University of North Carolina Diabetes Care Center |                                          | PI                                                      |                                                                                            |
| John B.                                  | Buse              |                              |                  | The University of North Carolina Diabetes Care Center |                                          | Co-I                                                    | Executive Committee                                                                        |
| Jeanine                                  | Dostou            |                              |                  | The University of North Carolina Diabetes Care Center |                                          | Co-I                                                    |                                                                                            |
| Sriram                                   | Machineni         |                              |                  | The University of North Carolina Diabetes Care Center |                                          | Co-I                                                    |                                                                                            |
| Laura                                    | Young             |                              |                  | The University of North Carolina Diabetes Care Center |                                          | Co-I                                                    |                                                                                            |
| Katherine                                | Bergamo           |                              |                  | The University of North Carolina Diabetes Care Center |                                          | Co-I, past                                              |                                                                                            |
| April                                    | Goley             |                              |                  | The University of North Carolina Diabetes Care Center |                                          | Co-I, past                                              |                                                                                            |
| Jeffrey                                  | Kerr              |                              |                  | The University of North Carolina Diabetes Care Center |                                          | Co-I, past                                              |                                                                                            |
| Joseph F.                                | Largay            |                              |                  | The University of North Carolina Diabetes Care Center |                                          | Co-I, past                                              |                                                                                            |
| Sonia                                    | Guarda            |                              |                  | The University of North Carolina Diabetes Care Center |                                          | SC                                                      |                                                                                            |
| Juanita                                  | Cuffee            |                              |                  | The University of North Carolina Diabetes Care Center |                                          | SC, past                                                |                                                                                            |
| Dawn                                     | Culmer            |                              |                  | The University of North Carolina Diabetes Care Center |                                          | SC, past                                                |                                                                                            |
| Rachael                                  | Fraser            |                              |                  | The University of North Carolina Diabetes Care Center |                                          | RC                                                      |                                                                                            |
| Hope                                     | Almeida           |                              |                  | The University of North Carolina Diabetes Care Center |                                          | RC, past                                                |                                                                                            |
| Samantha                                 | Coffer            |                              |                  | The University of North Carolina Diabetes Care Center |                                          | RC, past                                                |                                                                                            |

Supplemental Online Content: Nonauthor Collaborators

\*First name, last name, and suffix (if applicable) are required and will appear in PubMed.

| <b>*First Name and Middle Initial(s)</b> | <b>*Last Name</b> | <b>*Suffix (eg, Jr, III)</b> | Academic Degrees | Institution                                           | Location (city, state/province, country) | Role or Contribution, eg, chair, principal investigator | Group (if more than 1 Group listed in the byline) and/or Subgroup (eg, Steering Committee) |
|------------------------------------------|-------------------|------------------------------|------------------|-------------------------------------------------------|------------------------------------------|---------------------------------------------------------|--------------------------------------------------------------------------------------------|
| Elizabeth                                | Debnam            |                              |                  | The University of North Carolina Diabetes Care Center |                                          | RC, past                                                |                                                                                            |
| Lauren                                   | Kiker             |                              |                  | The University of North Carolina Diabetes Care Center |                                          | RC, past                                                |                                                                                            |
| Sarah                                    | Morton            |                              |                  | The University of North Carolina Diabetes Care Center |                                          | RC, past                                                |                                                                                            |
| Kim                                      | Josey             |                              |                  | The University of North Carolina Diabetes Care Center |                                          | RS                                                      |                                                                                            |
| Gail                                     | Fuller            |                              |                  | The University of North Carolina Diabetes Care Center |                                          | RS, past                                                |                                                                                            |
| W. Timothy                               | Garvey            |                              |                  | University of Alabama Birmingham                      |                                          | PI                                                      |                                                                                            |
| Andrea L.                                | Cherrington       |                              |                  | University of Alabama Birmingham                      |                                          | Co-PI                                                   |                                                                                            |
| Dana                                     | Dyer              |                              |                  | University of Alabama Birmingham                      |                                          | SC                                                      |                                                                                            |
| Mary Catherine Robertson                 | Lawson            |                              |                  | University of Alabama Birmingham                      |                                          | SC                                                      |                                                                                            |
| Olivia                                   | Griffith          |                              |                  | University of Alabama Birmingham                      |                                          | SC, past                                                |                                                                                            |
| April                                    | Agne              |                              |                  | University of Alabama Birmingham                      |                                          | RC                                                      |                                                                                            |
| Steve                                    | McCullars         |                              |                  | University of Alabama Birmingham                      |                                          | RC                                                      |                                                                                            |
| Robert M.                                | Cohen             |                              |                  | University of Cincinnati/Cincinnati VA Medical Center |                                          | PI                                                      |                                                                                            |
| Jacqueline                               | Craig             |                              |                  | University of Cincinnati/Cincinnati VA Medical Center |                                          | SC                                                      |                                                                                            |

## Supplemental Online Content: Nonauthor Collaborators

\*First name, last name, and suffix (if applicable) are required and will appear in PubMed.

| *First Name and Middle Initial(s) | *Last Name    | *Suffix (eg, Jr, III) | Academic Degrees | Institution                                           | Location (city, state/province, country) | Role or Contribution, eg, chair, principal investigator | Group (if more than 1 Group listed in the byline) and/or Subgroup (eg, Steering Committee) |
|-----------------------------------|---------------|-----------------------|------------------|-------------------------------------------------------|------------------------------------------|---------------------------------------------------------|--------------------------------------------------------------------------------------------|
| M. Colleen                        | Rogge         |                       |                  | University of Cincinnati/Cincinnati VA Medical Center |                                          | SC, past                                                |                                                                                            |
| Kathryn                           | Burton        |                       |                  | University of Cincinnati/Cincinnati VA Medical Center |                                          | SC, past                                                |                                                                                            |
| Kimberly                          | Kersey        |                       |                  | University of Cincinnati/Cincinnati VA Medical Center |                                          | SC, RC, past                                            |                                                                                            |
| Carla                             | Wilson        |                       |                  | University of Cincinnati/Cincinnati VA Medical Center |                                          | SC, past                                                |                                                                                            |
| Sonia                             | Lipp          |                       |                  | University of Cincinnati/Cincinnati VA Medical Center |                                          | RC, past                                                |                                                                                            |
| Mary Beth                         | Vonder Meulen |                       |                  | University of Cincinnati/Cincinnati VA Medical Center |                                          | RC, past                                                |                                                                                            |
| Connie                            | Adkins        |                       |                  | University of Cincinnati/Cincinnati VA Medical Center |                                          | RS                                                      |                                                                                            |
| Tolu                              | Onadeko       |                       |                  | University of Cincinnati/Cincinnati VA Medical Center |                                          | RS                                                      |                                                                                            |
| Neda                              | Rasouli       |                       |                  | University of Colorado-Denver/VA                      |                                          | PI                                                      |                                                                                            |
| Chelsea                           | Baker         |                       |                  | University of Colorado-Denver/VA                      |                                          | Co-I                                                    |                                                                                            |
| Emily                             | Schroeder     |                       |                  | University of Colorado-Denver/VA                      |                                          | Co-I, past                                              |                                                                                            |

## Supplemental Online Content: Nonauthor Collaborators

\*First name, last name, and suffix (if applicable) are required and will appear in PubMed.

| <b>*First Name and Middle Initial(s)</b> | <b>*Last Name</b> | <b>*Suffix (eg, Jr, III)</b> | Academic Degrees | Institution                      | Location (city, state/province, country) | Role or Contribution, eg, chair, principal investigator | Group (if more than 1 Group listed in the byline) and/or Subgroup (eg, Steering Committee) |
|------------------------------------------|-------------------|------------------------------|------------------|----------------------------------|------------------------------------------|---------------------------------------------------------|--------------------------------------------------------------------------------------------|
| Mitra                                    | Razzaghi          |                              |                  | University of Colorado-Denver/VA |                                          | Co-I                                                    |                                                                                            |
| Corey                                    | Lyon              |                              |                  | University of Colorado-Denver/VA |                                          | Co-I, past                                              |                                                                                            |
| Richard                                  | Penaloza          |                              |                  | University of Colorado-Denver/VA |                                          | Co-I, past                                              |                                                                                            |
| Chantal                                  | Underkofler       |                              |                  | University of Colorado-Denver/VA |                                          | SC                                                      |                                                                                            |
| Rebecca                                  | Lorch             |                              |                  | University of Colorado-Denver/VA |                                          | SC                                                      |                                                                                            |
| Sarah                                    | Douglass          |                              |                  | University of Colorado-Denver/VA |                                          | SC, past                                                |                                                                                            |
| Stephanie                                | Steiner           |                              |                  | University of Colorado-Denver/VA |                                          | SC, past                                                |                                                                                            |
| William                                  | Sivitz            |                              |                  | University of Iowa               |                                          | PI                                                      |                                                                                            |
| Erin                                     | Cline             |                              |                  | University of Iowa               |                                          | SC                                                      |                                                                                            |
| Laura K                                  | Knosp             |                              |                  | University of Iowa               |                                          | SC                                                      |                                                                                            |
| Jennifer                                 | McConnell         |                              |                  | University of Iowa               |                                          | SC, past                                                |                                                                                            |
| Tamara                                   | Lowe              |                              |                  | University of Iowa               |                                          | RC                                                      |                                                                                            |
| William H.                               | Herman            |                              |                  | University of Michigan           |                                          | PI                                                      | Economic Evaluation and Assessment Center                                                  |
| Rodica                                   | Pop-Busui         |                              |                  | University of Michigan           |                                          | Co-PI                                                   |                                                                                            |
| Meng H.                                  | Tan               |                              |                  | University of Michigan           |                                          | Co-I                                                    |                                                                                            |
| Catherine                                | Martin            |                              |                  | University of Michigan           |                                          | SC                                                      | Economic Evaluation and Assessment Center                                                  |
| Andrea                                   | Waltje            |                              |                  | University of Michigan           |                                          | SC, RC                                                  | Economic Evaluation and Assessment Center                                                  |
| Aimee                                    | Katona            |                              |                  | University of Michigan           |                                          | SC                                                      |                                                                                            |

## Supplemental Online Content: Nonauthor Collaborators

\*First name, last name, and suffix (if applicable) are required and will appear in PubMed.

| *First Name and Middle Initial(s) | *Last Name      | *Suffix (eg, Jr, III) | Academic Degrees | Institution                                    | Location (city, state/province, country) | Role or Contribution, eg, chair, principal investigator | Group (if more than 1 Group listed in the byline) and/or Subgroup (eg, Steering Committee) |
|-----------------------------------|-----------------|-----------------------|------------------|------------------------------------------------|------------------------------------------|---------------------------------------------------------|--------------------------------------------------------------------------------------------|
| Lynn                              | Goodhall        |                       |                  | University of Michigan                         |                                          | SC, past                                                |                                                                                            |
| Rebecca                           | Eggleston       |                       |                  | University of Michigan                         |                                          | RC, past                                                |                                                                                            |
| Shihchen                          | Kuo             |                       |                  | University of Michigan                         |                                          | RS                                                      | Economic Evaluation and Assessment Center                                                  |
| Stefana                           | Bojescu         |                       |                  | University of Michigan                         |                                          | RS, past                                                |                                                                                            |
| Stephanie                         | Bule            |                       |                  | University of Michigan                         |                                          | RS, past                                                |                                                                                            |
| Nancy                             | Kessler         |                       |                  | University of Michigan                         |                                          | RS, past                                                |                                                                                            |
| Elizabeth                         | LaSalle         |                       |                  | University of Michigan                         |                                          | RS, past                                                |                                                                                            |
| Kelly                             | Whitley         |                       |                  | University of Michigan                         |                                          | RS, past                                                |                                                                                            |
| Elizabeth R.                      | Seaquist        |                       |                  | University of Minnesota                        |                                          | PI                                                      |                                                                                            |
| Anne                              | Bantle          |                       |                  | University of Minnesota                        |                                          | Co-I                                                    |                                                                                            |
| Tasma                             | Harindhanavudhi |                       |                  | University of Minnesota                        |                                          | Co-I                                                    |                                                                                            |
| Anjali                            | Kumar           |                       |                  | University of Minnesota                        |                                          | Co-I                                                    |                                                                                            |
| Bruce                             | Redmon          |                       |                  | University of Minnesota                        |                                          | Co-I                                                    |                                                                                            |
| John                              | Bantle          |                       |                  | University of Minnesota                        |                                          | Co-I, past                                              |                                                                                            |
| Mary                              | Coe             |                       |                  | University of Minnesota                        |                                          | SC                                                      |                                                                                            |
| Michael                           | Mech            |                       |                  | University of Minnesota                        |                                          | SC                                                      |                                                                                            |
| Abdisa                            | Taddese         |                       |                  | University of Minnesota                        |                                          | RC                                                      |                                                                                            |
| Lesia                             | Lesne           |                       |                  | University of Minnesota                        |                                          | RS                                                      |                                                                                            |
| Shannon                           | Smith           |                       |                  | University of Minnesota                        |                                          | RS                                                      |                                                                                            |
| Cyrus                             | Desouza         |                       |                  | University of Nebraska Medical Center/Omaha VA |                                          | PI                                                      |                                                                                            |
| Lisa                              | Kuechenmeister  |                       |                  | University of Nebraska Medical Center/Omaha VA |                                          | Co-I                                                    |                                                                                            |
| Vijay                             | Shivaswamv      |                       |                  | University of Nebraska Medical Center/Omaha VA |                                          | Co-I                                                    |                                                                                            |
| Susan                             | Burbach         |                       |                  | University of Nebraska Medical Center/Omaha VA |                                          | SC                                                      |                                                                                            |

Supplemental Online Content: Nonauthor Collaborators

\*First name, last name, and suffix (if applicable) are required and will appear in PubMed.

| *First Name and Middle Initial(s) | *Last Name         | *Suffix (eg, Jr, III) | Academic Degrees | Institution                                    | Location (city, state/province, country) | Role or Contribution, eg, chair, principal investigator | Group (if more than 1 Group listed in the byline) and/or Subgroup (eg, Steering Committee) |
|-----------------------------------|--------------------|-----------------------|------------------|------------------------------------------------|------------------------------------------|---------------------------------------------------------|--------------------------------------------------------------------------------------------|
| Maria Grace                       | Rodriguez          |                       |                  | University of Nebraska Medical Center/Omaha VA |                                          | SC                                                      |                                                                                            |
| Kris                              | Seipel             |                       |                  | University of Nebraska Medical Center/Omaha VA |                                          | SC                                                      |                                                                                            |
| Alissa                            | Alfred             |                       |                  | University of Nebraska Medical Center/Omaha VA |                                          | SC, past                                                |                                                                                            |
| Ana Laura                         | Morales            |                       |                  | University of Nebraska Medical Center/Omaha VA |                                          | SC, past                                                |                                                                                            |
| Jenna                             | Eggert             |                       |                  | University of Nebraska Medical Center/Omaha VA |                                          | RS                                                      |                                                                                            |
| Grace                             | Lord               |                       |                  | University of Nebraska Medical Center/Omaha VA |                                          | RS                                                      |                                                                                            |
| William                           | Taylor             |                       |                  | University of Nebraska Medical Center/Omaha VA |                                          | RS, past                                                |                                                                                            |
| Renee                             | Tillson            |                       |                  | University of Nebraska Medical Center/Omaha VA |                                          | RS, past                                                |                                                                                            |
| David S.                          | Schade             |                       |                  | University of New Mexico                       |                                          | PI                                                      |                                                                                            |
| Allen                             | Adolphe            |                       |                  | University of New Mexico                       |                                          | Co-PI                                                   |                                                                                            |
| Mark                              | Burge              |                       |                  | University of New Mexico                       |                                          | Co-PI                                                   |                                                                                            |
| Elizabeth                         | Duran-Valdez       |                       |                  | University of New Mexico                       |                                          | SC                                                      |                                                                                            |
| Janae                             | Martinez           |                       |                  | University of New Mexico                       |                                          | RC, past                                                |                                                                                            |
| Anna                              | Bancroft           |                       |                  | University of New Mexico                       |                                          | RS                                                      |                                                                                            |
| Susan                             | Kunkel             |                       |                  | University of New Mexico                       |                                          | RS                                                      |                                                                                            |
| Fadi Ali                          | Jamaleddin Ahmad   |                       |                  | University of New Mexico                       |                                          | RS, past                                                |                                                                                            |
| Doris                             | Hernandez McGinnis |                       |                  | University of New Mexico                       |                                          | RS, past                                                |                                                                                            |
| Benjamin                          | Pucchetti          |                       |                  | University of New Mexico                       |                                          | RS, past                                                |                                                                                            |
| Elizabeth                         | Scripsick          |                       |                  | University of New Mexico                       |                                          | RS, past                                                |                                                                                            |
| Amy                               | Zamorano           |                       |                  | University of New Mexico                       |                                          | RS, past                                                |                                                                                            |

Supplemental Online Content: Nonauthor Collaborators

\*First name, last name, and suffix (if applicable) are required and will appear in PubMed.

| <b>*First Name and Middle Initial(s)</b> | <b>*Last Name</b> | <b>*Suffix (eg, Jr, III)</b> | Academic Degrees | Institution                                     | Location (city, state/province, country) | Role or Contribution, eg, chair, principal investigator | Group (if more than 1 Group listed in the byline) and/or Subgroup (eg, Steering Committee) |
|------------------------------------------|-------------------|------------------------------|------------------|-------------------------------------------------|------------------------------------------|---------------------------------------------------------|--------------------------------------------------------------------------------------------|
| Ralph A.                                 | DeFronzo          |                              |                  | University of Texas Health San Antonio          |                                          | PI                                                      |                                                                                            |
| Eugenio                                  | Cersosimo         |                              |                  | University of Texas Health San Antonio          |                                          | Co-PI                                                   |                                                                                            |
| Muhammad                                 | Abdul-Ghani       |                              |                  | University of Texas Health San Antonio          |                                          | Co-I                                                    |                                                                                            |
| Curtis                                   | Triplitt          |                              |                  | University of Texas Health San Antonio          |                                          | Co-I                                                    |                                                                                            |
| Deanna                                   | Juarez            |                              |                  | University of Texas Health San Antonio          |                                          | SC                                                      |                                                                                            |
| Rosa Irene                               | Garza             |                              |                  | University of Texas Health San Antonio          |                                          | SC, past                                                |                                                                                            |
| Hector                                   | Verastiqui        |                              |                  | University of Texas Health San Antonio          |                                          | SC, past                                                |                                                                                            |
| Kathryn                                  | Wright            |                              |                  | University of Texas Health San Antonio          |                                          | RC, past                                                |                                                                                            |
| Curtiss                                  | Puckett           |                              |                  | University of Texas Health San Antonio          |                                          | RS                                                      |                                                                                            |
| Philip                                   | Raskin            |                              |                  | University of Texas Southwestern Medical Center |                                          | PI                                                      |                                                                                            |
| Chanhaeng                                | Rhee              |                              |                  | University of Texas Southwestern Medical Center |                                          | Co-I, past                                              |                                                                                            |
| Soma                                     | Abraham           |                              |                  | University of Texas Southwestern Medical Center |                                          | SC                                                      |                                                                                            |
| Lin Fan                                  | Jordan            |                              |                  | University of Texas Southwestern Medical Center |                                          | SC                                                      |                                                                                            |
| Serey                                    | Sao               |                              |                  | University of Texas Southwestern Medical Center |                                          | SC                                                      |                                                                                            |
| Luisa                                    | Morton            |                              |                  | University of Texas Southwestern Medical Center |                                          | SC, past                                                |                                                                                            |

## Supplemental Online Content: Nonauthor Collaborators

\*First name, last name, and suffix (if applicable) are required and will appear in PubMed.

| <b>*First Name and Middle Initial(s)</b> | <b>*Last Name</b>    | <b>*Suffix (eg, Jr, III)</b> | Academic Degrees | Institution                                                | Location (city, state/province, country) | Role or Contribution, eg, chair, principal investigator | Group (if more than 1 Group listed in the byline) and/or Subgroup (eg, Steering Committee) |
|------------------------------------------|----------------------|------------------------------|------------------|------------------------------------------------------------|------------------------------------------|---------------------------------------------------------|--------------------------------------------------------------------------------------------|
| Oralenda                                 | Smith                |                              |                  | University of Texas Southwestern Medical Center            |                                          | SC, past                                                |                                                                                            |
| Laura                                    | Osornio Walker       |                              |                  | University of Texas Southwestern Medical Center            |                                          | RC, past                                                |                                                                                            |
| Laura                                    | Schnurr-Breen        |                              |                  | University of Texas Southwestern Medical Center            |                                          | RC, past                                                |                                                                                            |
| Rosa Irene                               | Ayala                |                              |                  | University of Texas Southwestern Medical Center            |                                          | RS                                                      |                                                                                            |
| Robert Brian                             | Kreymer              |                              |                  | University of Texas Southwestern Medical Center            |                                          | RS                                                      |                                                                                            |
| Daytheon                                 | Sturgess             |                              |                  | University of Texas Southwestern Medical Center            |                                          | RS, past                                                |                                                                                            |
| Kristina M                               | Utzschneider         |                              |                  | VA Puget Sound Health Care System/University of Washington |                                          | PI                                                      |                                                                                            |
| Steven E.                                | Kahn                 |                              |                  | VA Puget Sound Health Care System/University of Washington |                                          | Co-I                                                    | Executive Committee                                                                        |
| Lorena                                   | Alarcon-Casas Wright |                              |                  | VA Puget Sound Health Care System/University of Washington |                                          | Co-I                                                    |                                                                                            |
| Edward J.                                | Boyko                |                              |                  | VA Puget Sound Health Care System/University of Washington |                                          | Co-I                                                    |                                                                                            |
| Elaine C.                                | Tsiai                |                              |                  | VA Puget Sound Health Care System/University of Washington |                                          | Co-I                                                    |                                                                                            |
| Dace L.                                  | Trence               |                              |                  | VA Puget Sound Health Care System/University of Washington |                                          | Co-I, past                                              |                                                                                            |

## Supplemental Online Content: Nonauthor Collaborators

\*First name, last name, and suffix (if applicable) are required and will appear in PubMed.

| *First Name and Middle Initial(s) | *Last Name    | *Suffix (eg, Jr, III) | Academic Degrees | Institution                                                | Location (city, state/province, country) | Role or Contribution, eg, chair, principal investigator | Group (if more than 1 Group listed in the byline) and/or Subgroup (eg, Steering Committee) |
|-----------------------------------|---------------|-----------------------|------------------|------------------------------------------------------------|------------------------------------------|---------------------------------------------------------|--------------------------------------------------------------------------------------------|
| Subblaxmi                         | Trikudanathan |                       |                  | VA Puget Sound Health Care System/University of Washington |                                          | Co-I, past                                              |                                                                                            |
| Basma N.                          | Fattaleh      |                       |                  | VA Puget Sound Health Care System/University of Washington |                                          | SC                                                      |                                                                                            |
| Brenda K                          | Montgomery    |                       |                  | VA Puget Sound Health Care System/University of Washington |                                          | SC, past                                                |                                                                                            |
| Karen M.                          | Atkinson      |                       |                  | VA Puget Sound Health Care System/University of Washington |                                          | RS                                                      |                                                                                            |
| Alexandra                         | Kozedub       |                       |                  | VA Puget Sound Health Care System/University of Washington |                                          | RS                                                      |                                                                                            |
| Tessa                             | Concepcion    |                       |                  | VA Puget Sound Health Care System/University of Washington |                                          | RS, past                                                |                                                                                            |
| Cameron                           | Moak          |                       |                  | VA Puget Sound Health Care System/University of Washington |                                          | RS, past                                                |                                                                                            |
| Nina                              | Prikhodko     |                       |                  | VA Puget Sound Health Care System/University of Washington |                                          | RS, past                                                |                                                                                            |
| Samantha                          | Rhothisen     |                       |                  | VA Puget Sound Health Care System/University of Washington |                                          | RS, past                                                |                                                                                            |
| Tom A.                            | Elasz         |                       |                  | Vanderbilt University                                      |                                          | PI                                                      |                                                                                            |
| Stephanie                         | Martin        |                       |                  | Vanderbilt University                                      |                                          | SC                                                      |                                                                                            |
| Laura                             | Shackelford   |                       |                  | Vanderbilt University                                      |                                          | RC, RS, past                                            |                                                                                            |
| Rita                              | Goidel        |                       |                  | Vanderbilt University                                      |                                          | RS                                                      |                                                                                            |

## Supplemental Online Content: Nonauthor Collaborators

\*First name, last name, and suffix (if applicable) are required and will appear in PubMed.

| *First Name and Middle Initial(s) | *Last Name  | *Suffix (eg, Jr, III) | Academic Degrees | Institution                                                                     | Location (city, state/province, country) | Role or Contribution, eg, chair, principal investigator | Group (if more than 1 Group listed in the byline) and/or Subgroup (eg, Steering Committee) |
|-----------------------------------|-------------|-----------------------|------------------|---------------------------------------------------------------------------------|------------------------------------------|---------------------------------------------------------|--------------------------------------------------------------------------------------------|
| Nina                              | Hinkle      |                       |                  | Vanderbilt University                                                           |                                          | RS                                                      |                                                                                            |
| Cynthia                           | Lovell      |                       |                  | Vanderbilt University                                                           |                                          | RS                                                      |                                                                                            |
| Janet                             | Myers       |                       |                  | Vanderbilt University                                                           |                                          | RS                                                      |                                                                                            |
| Janie                             | Lipps Hogan |                       |                  | Vanderbilt University                                                           |                                          | RS                                                      |                                                                                            |
| Janet B.                          | McGill      |                       |                  | Washington University                                                           |                                          | PI                                                      |                                                                                            |
| Maamoun                           | Salam       |                       |                  | Washington University                                                           |                                          | Co-I                                                    |                                                                                            |
| Toni                              | Schweiger   |                       |                  | Washington University                                                           |                                          | SC, RC                                                  |                                                                                            |
| Sarah                             | Kissel      |                       |                  | Washington University                                                           |                                          | SC, RC, past                                            |                                                                                            |
| Carol                             | Recklein    |                       |                  | Washington University                                                           |                                          | SC, past                                                |                                                                                            |
| Mary Jane                         | Clifton     |                       |                  | Washington University                                                           |                                          | RS                                                      |                                                                                            |
| William                           | Tamborlane  |                       |                  | Yale University/Fair Haven Community Health Center/West Haven VA Medical Center |                                          | PI                                                      |                                                                                            |
| Anne                              | Camp        |                       |                  | Yale University/Fair Haven Community Health Center/West Haven VA Medical Center |                                          | Co-I                                                    |                                                                                            |
| Barbara                           | Gulanski    |                       |                  | Yale University/Fair Haven Community Health Center/West Haven VA Medical Center |                                          | Co-I                                                    |                                                                                            |
| Silvio E                          | Inzucchi    |                       |                  | Yale University/Fair Haven Community Health Center/West Haven VA Medical Center |                                          | Co-I                                                    |                                                                                            |
| Kim                               | Pham        |                       |                  | Yale University/Fair Haven Community Health Center/West Haven VA Medical Center |                                          | Co-I                                                    |                                                                                            |

Supplemental Online Content: Nonauthor Collaborators

\*First name, last name, and suffix (if applicable) are required and will appear in PubMed.

| <b>*First Name and Middle Initial(s)</b> | <b>*Last Name</b> | <b>*Suffix (eg, Jr, III)</b> | Academic Degrees | Institution                                                                     | Location (city, state/province, country) | Role or Contribution, eg, chair, principal investigator | Group (if more than 1 Group listed in the byline) and/or Subgroup (eg, Steering Committee) |
|------------------------------------------|-------------------|------------------------------|------------------|---------------------------------------------------------------------------------|------------------------------------------|---------------------------------------------------------|--------------------------------------------------------------------------------------------|
| Michele                                  | Alguard           |                              |                  | Yale University/Fair Haven Community Health Center/West Haven VA Medical Center |                                          | SC, RC                                                  |                                                                                            |
| Patricia                                 | Gatcomb           |                              |                  | Yale University/Fair Haven Community Health Center/West Haven VA Medical Center |                                          | SC                                                      |                                                                                            |
| Katarzyna                                | Lessard           |                              |                  | Yale University/Fair Haven Community Health Center/West Haven VA Medical Center |                                          | SC                                                      |                                                                                            |
| Magalys                                  | Perez             |                              |                  | Yale University/Fair Haven Community Health Center/West Haven VA Medical Center |                                          | SC                                                      |                                                                                            |
| Lynne                                    | Iannone           |                              |                  | Yale University/Fair Haven Community Health Center/West Haven VA Medical Center |                                          | RC                                                      |                                                                                            |
| Elizabeth                                | Magenheimer       |                              |                  | Yale University/Fair Haven Community Health Center/West Haven VA Medical Center |                                          | RC                                                      |                                                                                            |
| Abmaridel                                | Montosa           |                              |                  | Yale University/Fair Haven Community Health Center/West Haven VA Medical Center |                                          | RC                                                      |                                                                                            |

## Supplemental Online Content: Nonauthor Collaborators

\*First name, last name, and suffix (if applicable) are required and will appear in PubMed.

| *First Name and Middle Initial(s) | *Last Name       | *Suffix (eg, Jr, III) | Academic Degrees | Institution                                                                | Location (city, state/province, country) | Role or Contribution, eg, chair, principal investigator                    | Group (if more than 1 Group listed in the byline) and/or Subgroup (eg, Steering Committee) |
|-----------------------------------|------------------|-----------------------|------------------|----------------------------------------------------------------------------|------------------------------------------|----------------------------------------------------------------------------|--------------------------------------------------------------------------------------------|
| William T                         | Cefalu           |                       |                  | NIH/NIDDK (Study Sponsor)                                                  |                                          | Director, Division of Diabetes, Endocrinology and Metabolic Diseases       |                                                                                            |
| Judith                            | Fradkin          |                       |                  | NIH/NIDDK (Study Sponsor)                                                  |                                          | Director, Division of Diabetes, Endocrinology and Metabolic Diseases, past |                                                                                            |
| Henry B.                          | Burch            |                       |                  | NIH/NIDDK (Study Sponsor)                                                  |                                          | Project Scientist                                                          | Executive Committee                                                                        |
| Andrew                            | Bremer           |                       |                  | NIH/NIDDK (Study Sponsor)                                                  |                                          | Program Scientist, past                                                    | Executive Committee                                                                        |
| David M.                          | Nathan           |                       |                  | Chairman's Office, Massachusetts General Hospital, Harvard Medical School  |                                          | Study, Chair, Study Co-PI                                                  | Executive Committee                                                                        |
| John M.                           | Lachin           |                       |                  | Coordinating Center, The George Washington University Biostatistics Center |                                          | U01 Contact PI, Study Co-PI                                                | Executive Committee                                                                        |
| Heidi                             | Krause-Steinrauf |                       |                  | Coordinating Center, The George Washington University Biostatistics Center |                                          | Co-I, Project Director                                                     | Executive Committee                                                                        |
| Naji                              | Younes           |                       |                  | Coordinating Center, The George Washington University Biostatistics Center |                                          | Co-I                                                                       |                                                                                            |
| Ionut                             | Bebu             |                       |                  | Coordinating Center, The George Washington University Biostatistics Center |                                          | RS                                                                         |                                                                                            |
| Nicole                            | Butera           |                       |                  | Coordinating Center, The George Washington University Biostatistics Center |                                          | RS                                                                         |                                                                                            |

Supplemental Online Content: Nonauthor Collaborators

\*First name, last name, and suffix (if applicable) are required and will appear in PubMed.

| *First Name and Middle Initial(s) | *Last Name | *Suffix (eg, Jr, III) | Academic Degrees | Institution                                                                | Location (city, state/province, country) | Role or Contribution, eg, chair, principal investigator | Group (if more than 1 Group listed in the byline) and/or Subgroup (eg, Steering Committee) |
|-----------------------------------|------------|-----------------------|------------------|----------------------------------------------------------------------------|------------------------------------------|---------------------------------------------------------|--------------------------------------------------------------------------------------------|
| CJ                                | Buys       |                       |                  | Coordinating Center, The George Washington University Biostatistics Center |                                          | RS                                                      |                                                                                            |
| Anna                              | Fagan      |                       |                  | Coordinating Center, The George Washington University Biostatistics Center |                                          | RS                                                      |                                                                                            |
| Yuping                            | Gao        |                       |                  | Coordinating Center, The George Washington University Biostatistics Center |                                          | RS                                                      |                                                                                            |
| Alokananda                        | Ghosh      |                       |                  | Coordinating Center, The George Washington University Biostatistics Center |                                          | RS                                                      |                                                                                            |
| Michaela R.                       | Gramzinski |                       |                  | Coordinating Center, The George Washington University Biostatistics Center |                                          | RS                                                      |                                                                                            |
| Stephanie D.                      | Hall       |                       |                  | Coordinating Center, The George Washington University Biostatistics Center |                                          | RS                                                      |                                                                                            |
| Erin                              | Kazemi     |                       |                  | Coordinating Center, The George Washington University Biostatistics Center |                                          | RS                                                      |                                                                                            |
| Elizabeth                         | Legowski   |                       |                  | Coordinating Center, The George Washington University Biostatistics Center |                                          | RS                                                      |                                                                                            |
| Haiyin                            | Liu        |                       |                  | Coordinating Center, The George Washington University Biostatistics Center |                                          | RS                                                      |                                                                                            |
| Colleen E.                        | Suratt     |                       |                  | Coordinating Center, The George Washington University Biostatistics Center |                                          | RS                                                      |                                                                                            |

## Supplemental Online Content: Nonauthor Collaborators

\*First name, last name, and suffix (if applicable) are required and will appear in PubMed.

| *First Name and Middle Initial(s) | *Last Name      | *Suffix (eg, Jr, III) | Academic Degrees | Institution                                                                                         | Location (city, state/province, country) | Role or Contribution, eg, chair, principal investigator | Group (if more than 1 Group listed in the byline) and/or Subgroup (eg, Steering Committee) |
|-----------------------------------|-----------------|-----------------------|------------------|-----------------------------------------------------------------------------------------------------|------------------------------------------|---------------------------------------------------------|--------------------------------------------------------------------------------------------|
| Mark                              | Tripputi        |                       |                  | Coordinating Center, The George Washington University Biostatistics Center                          |                                          | RS                                                      |                                                                                            |
| Alyssa                            | Arey            |                       |                  | Coordinating Center, The George Washington University Biostatistics Center                          |                                          | RS, past                                                |                                                                                            |
| Michael                           | Backman         |                       |                  | Coordinating Center, The George Washington University Biostatistics Center                          |                                          | RS, past                                                |                                                                                            |
| Joel                              | Bethepu         |                       |                  | Coordinating Center, The George Washington University Biostatistics Center                          |                                          | RS, past                                                |                                                                                            |
| Claire                            | Lund            |                       |                  | Coordinating Center, The George Washington University Biostatistics Center                          |                                          | RS, past                                                |                                                                                            |
| Pam                               | Mangat Dhaliwal |                       |                  | Coordinating Center, The George Washington University Biostatistics Center                          |                                          | RS, past                                                |                                                                                            |
| Paula                             | McGee           |                       |                  | Coordinating Center, The George Washington University Biostatistics Center                          |                                          | RS, past                                                |                                                                                            |
| Emily                             | Mesimer         |                       |                  | Coordinating Center, The George Washington University Biostatistics Center                          |                                          | RS, past                                                |                                                                                            |
| Lisa                              | Ngo             |                       |                  | Coordinating Center, The George Washington University Biostatistics Center                          |                                          | RS, past                                                |                                                                                            |
| Michael                           | Steffes         |                       |                  | Central Biochemical Laboratory, University of Minnesota Advanced Research and Diagnostic Laboratory |                                          | PI                                                      |                                                                                            |

## Supplemental Online Content: Nonauthor Collaborators

\*First name, last name, and suffix (if applicable) are required and will appear in PubMed.

| *First Name and Middle Initial(s) | *Last Name | *Suffix (eg, Jr, III) | Academic Degrees | Institution                                                                                             | Location (city, state/province, country) | Role or Contribution, eg, chair, principal investigator | Group (if more than 1 Group listed in the byline) and/or Subgroup (eg, Steering Committee) |
|-----------------------------------|------------|-----------------------|------------------|---------------------------------------------------------------------------------------------------------|------------------------------------------|---------------------------------------------------------|--------------------------------------------------------------------------------------------|
| Jesse                             | Seegmiller |                       |                  | Central Biochemical Laboratory, University of Minnesota Advanced Research and Diagnostic Laboratory     |                                          | Co-I                                                    |                                                                                            |
| Amy                               | Saenger    |                       |                  | Central Biochemical Laboratory, University of Minnesota Advanced Research and Diagnostic Laboratory     |                                          | Co-I, past                                              |                                                                                            |
| Valerie                           | Arends     |                       |                  | Central Biochemical Laboratory, University of Minnesota Advanced Research and Diagnostic Laboratory     |                                          | SC                                                      |                                                                                            |
| Deanna                            | Gabrielson |                       |                  | Central Biochemical Laboratory, University of Minnesota Advanced Research and Diagnostic Laboratory     |                                          | SC, past                                                |                                                                                            |
| Todd                              | Conner     |                       |                  | Drug Distribution Center, VA Cooperative Studies Program Clinical Research Pharmacy Coordinating Center |                                          | PI                                                      |                                                                                            |
| Stuart                            | Warren     |                       |                  | Drug Distribution Center, VA Cooperative Studies Program Clinical Research Pharmacy Coordinating Center |                                          | PI, past                                                |                                                                                            |
| Jolene                            | Day        |                       |                  | Drug Distribution Center, VA Cooperative Studies Program Clinical Research Pharmacy Coordinating Center |                                          | RS                                                      |                                                                                            |

## Supplemental Online Content: Nonauthor Collaborators

\*First name, last name, and suffix (if applicable) are required and will appear in PubMed.

| *First Name and Middle Initial(s) | *Last Name | *Suffix (eg, Jr, III) | Academic Degrees | Institution                                                                                             | Location (city, state/province, country) | Role or Contribution, eg, chair, principal investigator | Group (if more than 1 Group listed in the byline) and/or Subgroup (eg, Steering Committee) |
|-----------------------------------|------------|-----------------------|------------------|---------------------------------------------------------------------------------------------------------|------------------------------------------|---------------------------------------------------------|--------------------------------------------------------------------------------------------|
| Jeffrey                           | Huminik    |                       |                  | Drug Distribution Center, VA Cooperative Studies Program Clinical Research Pharmacy Coordinating Center |                                          | RS                                                      |                                                                                            |
| Alexandra                         | Scrymgeour |                       |                  | Drug Distribution Center, VA Cooperative Studies Program Clinical Research Pharmacy Coordinating Center |                                          | RS                                                      |                                                                                            |
| Elsayed Z.                        | Soliman    |                       |                  | ECG Reading Center, EPICARE, Wake Forest University                                                     |                                          | PI                                                      |                                                                                            |
| Yashashwi                         | Pokharel   |                       |                  | ECG Reading Center, EPICARE, Wake Forest University                                                     |                                          | PI, past                                                |                                                                                            |
| Zhu-Ming                          | Zhang      |                       |                  | ECG Reading Center, EPICARE, Wake Forest University                                                     |                                          | Co-I, past                                              |                                                                                            |
| Charles                           | Campbell   |                       |                  | ECG Reading Center, EPICARE, Wake Forest University                                                     |                                          | SC                                                      |                                                                                            |
| Julie                             | Hu         |                       |                  | ECG Reading Center, EPICARE, Wake Forest University                                                     |                                          | SC                                                      |                                                                                            |
| Lisa                              | Keasler    |                       |                  | ECG Reading Center, EPICARE, Wake Forest University                                                     |                                          | SC                                                      |                                                                                            |
| Susan                             | Hensley    |                       |                  | ECG Reading Center, EPICARE, Wake Forest University                                                     |                                          | SC, past                                                |                                                                                            |
| Yabing                            | Li         |                       |                  | ECG Reading Center, EPICARE, Wake Forest University                                                     |                                          | RS                                                      |                                                                                            |
| Rada                              | Mihalcea   |                       |                  | Economic Evaluation and Assessment Center, University of Michigan                                       |                                          | RS                                                      |                                                                                            |
| Do June                           | Min        |                       |                  | Economic Evaluation and Assessment Center, University of Michigan                                       |                                          | RS                                                      |                                                                                            |

## Supplemental Online Content: Nonauthor Collaborators

\*First name, last name, and suffix (if applicable) are required and will appear in PubMed.

| *First Name and Middle Initial(s) | *Last Name  | *Suffix (eg, Jr, III) | Academic Degrees | Institution                                                                            | Location (city, state/province, country) | Role or Contribution, eg, chair, principal investigator | Group (if more than 1 Group listed in the byline) and/or Subgroup (eg, Steering Committee) |
|-----------------------------------|-------------|-----------------------|------------------|----------------------------------------------------------------------------------------|------------------------------------------|---------------------------------------------------------|--------------------------------------------------------------------------------------------|
| Veronica                          | Perez-Rosas |                       |                  | Economic Evaluation and Assessment Center, University of Michigan                      |                                          | RS                                                      |                                                                                            |
| Lisa                              | Prosser     |                       |                  | Economic Evaluation and Assessment Center, University of Michigan                      |                                          | RS                                                      |                                                                                            |
| Kenneth                           | Resnicow    |                       |                  | Economic Evaluation and Assessment Center, University of Michigan                      |                                          | RS                                                      |                                                                                            |
| Wen                               | Ye          |                       |                  | Economic Evaluation and Assessment Center, University of Michigan                      |                                          | RS                                                      |                                                                                            |
| Hui                               | Shao        |                       |                  | Economic Evaluation and Assessment Center, Centers for Disease Control and Prevention  |                                          | RS                                                      |                                                                                            |
| Ping                              | Zhang       |                       |                  | Economic Evaluation and Assessment Center, Centers for Disease Control and Prevention  |                                          | RS                                                      |                                                                                            |
| Jose                              | Luchsinger  |                       |                  | Neurocognitive Coordinating Center, Columbia University Medical Center                 |                                          | PI                                                      |                                                                                            |
| Danurys                           | Sanchez     |                       |                  | Neurocognitive Coordinating Center, Columbia University Medical Center                 |                                          | SC                                                      |                                                                                            |
| Stephanie                         | Assuras     |                       |                  | Neurocognitive Coordinating Center, Columbia University Medical Center                 |                                          | RS                                                      |                                                                                            |
| Erik                              | Groessl     |                       |                  | QWB Reading Center, University of California San Diego Health Services Research Center |                                          | PI                                                      |                                                                                            |

## Supplemental Online Content: Nonauthor Collaborators

\*First name, last name, and suffix (if applicable) are required and will appear in PubMed.

| *First Name and Middle Initial(s) | *Last Name | *Suffix (eg, Jr, III) | Academic Degrees | Institution                                                                            | Location (city, state/province, country) | Role or Contribution, eg, chair, principal investigator | Group (if more than 1 Group listed in the byline) and/or Subgroup (eg, Steering Committee) |
|-----------------------------------|------------|-----------------------|------------------|----------------------------------------------------------------------------------------|------------------------------------------|---------------------------------------------------------|--------------------------------------------------------------------------------------------|
| Fatema                            | Sakha      |                       |                  | QWB Reading Center, University of California San Diego Health Services Research Center |                                          | SC                                                      |                                                                                            |
| Helen                             | Chong      |                       |                  | QWB Reading Center, University of California San Diego Health Services Research Center |                                          | SC, past                                                |                                                                                            |
| Naomi                             | Hillery    |                       |                  | QWB Reading Center, University of California San Diego Health Services Research Center |                                          | RS                                                      |                                                                                            |
| Ivan                              | Abdouch    |                       |                  | University of Nebraska Medical Center/Omaha VA                                         |                                          | Collaborating Investigator-Recruitment                  |                                                                                            |
| Gul                               | Bahityar   |                       |                  | SUNY Downstate Medical Center                                                          |                                          | Collaborating Investigator-Recruitment                  |                                                                                            |
| Paula                             | Brantley   |                       |                  | Pennington Biomedical Research Center (LSU)                                            |                                          | Collaborating Investigator-Recruitment                  |                                                                                            |
| Frances E.                        | Broyles    |                       |                  | Swedish Medical Center                                                                 |                                          | Collaborating Investigator-Recruitment                  |                                                                                            |
| Gay                               | Canaris    |                       |                  | University of Nebraska Medical Center/Omaha VA                                         |                                          | Collaborating Investigator-Recruitment                  |                                                                                            |
| Paul                              | Copeland   |                       |                  | Massachusetts General Hospital                                                         |                                          | Collaborating Investigator-Recruitment                  |                                                                                            |

## Supplemental Online Content: Nonauthor Collaborators

\*First name, last name, and suffix (if applicable) are required and will appear in PubMed.

| <b>*First Name and Middle Initial(s)</b> | <b>*Last Name</b> | <b>*Suffix (eg, Jr, III)</b> | Academic Degrees | Institution                                 | Location (city, state/province, country) | Role or Contribution, eg, chair, principal investigator | Group (if more than 1 Group listed in the byline) and/or Subgroup (eg, Steering Committee) |
|------------------------------------------|-------------------|------------------------------|------------------|---------------------------------------------|------------------------------------------|---------------------------------------------------------|--------------------------------------------------------------------------------------------|
| Jeri J.                                  | Craine            |                              |                  | UW Valley Medical Center                    |                                          | Collaborating Investigator-Recruitment                  |                                                                                            |
| Warren L.                                | Fein              |                              |                  | Swedish Medical Center                      |                                          | Collaborating Investigator-Recruitment                  |                                                                                            |
| Agnieska                                 | Gliwa             |                              |                  | SUNY Downstate Medical Center               |                                          | Collaborating Investigator-Recruitment                  |                                                                                            |
| Lisel M.                                 | Hope              |                              |                  | SUNY Downstate Medical Center               |                                          | Collaborating Investigator-Recruitment                  |                                                                                            |
| Melissa S.                               | Lee               |                              |                  | SUNY Downstate Medical Center               |                                          | Collaborating Investigator-Recruitment                  |                                                                                            |
| Rebecca                                  | Meiners           |                              |                  | Pennington Biomedical Research Center (LSU) |                                          | Collaborating Investigator-Recruitment                  |                                                                                            |
| Vaughn                                   | Meiners           |                              |                  | Pennington Biomedical Research Center (LSU) |                                          | Collaborating Investigator-Recruitment                  |                                                                                            |
| Hollis                                   | O'Neal            |                              |                  | Pennington Biomedical Research Center (LSU) |                                          | Collaborating Investigator-Recruitment                  |                                                                                            |
| James E.                                 | Park              |                              |                  | UW Valley Medical Center                    |                                          | Collaborating Investigator-Recruitment                  |                                                                                            |
| Alan                                     | Sacerdote         |                              |                  | SUNY Downstate Medical Center               |                                          | Collaborating Investigator-Recruitment                  |                                                                                            |

Supplemental Online Content: Nonauthor Collaborators

\*First name, last name, and suffix (if applicable) are required and will appear in PubMed.

| <b>*First Name and Middle Initial(s)</b> | <b>*Last Name</b> | <b>*Suffix (eg, Jr, III)</b> | Academic Degrees | Institution                                 | Location (city, state/province, country) | Role or Contribution, eg, chair, principal investigator | Group (if more than 1 Group listed in the byline) and/or Subgroup (eg, Steering Committee) |
|------------------------------------------|-------------------|------------------------------|------------------|---------------------------------------------|------------------------------------------|---------------------------------------------------------|--------------------------------------------------------------------------------------------|
| Edward                                   | Sledge            | Jr.                          |                  | Pennington Biomedical Research Center (LSU) |                                          | Collaborating Investigator-Recruitment                  |                                                                                            |
| Lisa                                     | Soni              |                              |                  | SUNY Downstate Medical Center               |                                          | Collaborating Investigator-Recruitment                  |                                                                                            |
| Jeanne                                   | Steppel-Reznik    |                              |                  | Massachusetts General Hospital              |                                          | Collaborating Investigator-Recruitment                  |                                                                                            |
| Alexander                                | Turchin           |                              |                  | Massachusetts General Hospital              |                                          | Collaborating Investigator-Recruitment                  |                                                                                            |
