# Supplementary material
Source: PubMed Central journal article supplement (PMC10203973)
Supplement: jamainternmed-e231487-s004.pdf [file jamainternmed-e231487-s004.pdf]

## Data Sharing Statement

Wexler. Comparative Effects of Glucose-Lowering Medications on Kidney Outcomes in Type 2 Diabetes. *JAMA Intern Med.* Published May 22, 2023. doi:10.1001/jamainternmed.2023.1487

### Data

**Data available:** Yes

**Data types:** Deidentified participant data

**How to access data:** This manuscript is based on follow-up data and outcome assessments from the 5047 participants enrolled into the GRADE study. The de-identified dataset will be submitted to the NIDDK Central Repository (<https://repository.niddk.nih.gov/home/>) by 2024.

**When available:** beginning date: 12-31-2024

### Supporting Documents

**Document types:** None

### Additional Information

**Who can access the data:** n/a

**Types of analyses:** n/a

**Mechanisms of data availability:** n/a
